# Supplementary material
Source: MDPI journal article supplement (https://www.mdpi.com/2073-4395/13/8/2053)
Supplement: s1 [file s1]

| Acc. number         | Gene name                                              | Sequence (5' - 3')       |
|---------------------|--------------------------------------------------------|--------------------------|
| AY049040 F (wheat)  | <i>18S ribosomal RNA</i>                               | gtgacgggtgacggagaatt     |
| AY049040 R (wheat)  |                                                        | gacactaatgcgcccggtat     |
| XM_026559244.1 F    | <i>Elongation factor 1 <math>\alpha</math> subunit</i> | cctccaactcaaaggatgaccctg |
| XM_026559244.1 R    |                                                        | gcataaccgttaccgatctgacca |
| PrGSTU MW306747.1 F | <i>PrGSTU1</i>                                         | gtttggtcttctgctggtca     |
| PrGSTU MW306747.1 R |                                                        | tgtaggttgcccagaaacga     |
| SRR7345723.25110F   | <i>PrGSTU2</i>                                         | tgggtgttatgttggttga      |
| SRR7345723.25110 R  |                                                        | cgggaacttttgtttcatca     |
| SRR7345723.22480 F  | <i>PrGSTU3</i>                                         | tgggtcttcttggtcattc      |
| SRR7345723.22480 R  |                                                        | tggctgcttttcttctctg      |
| SRR7345723.6320 F   | <i>PrGSTU4</i>                                         | atgcttcattgctcgtttc      |
| SRR7345723.6320 R   |                                                        | tggctgcttttcttctctg      |
| SRR7345723.100827 F | <i>PrGSTF</i>                                          | ggtgaactggatggaagtcg     |
| SRR7345723.100827 R |                                                        | caagccaaagccgatgatac     |
| AY049040 F          | <i>18S ribosomal RNA</i>                               | gtgacgggtgacggagaatt     |
| AY049040 R          |                                                        | gacactaatgcgcccggtat     |
| EF_1 (AK334915) F   | Elongation factor 1 $\alpha$ subunit                   | aacttcacctcccaggtcat     |
| EF_1 (AK334915) R   |                                                        | gtcaccagctcagcaaactt     |
| AJ414698 F          | TaGSTU1B                                               | cggaggggaaggaacaaataa    |
| AJ414698 R          |                                                        | cactgactgacccaaccaac     |
| AJ414700 F          | TaGSTU2                                                | ccgtgctcgttggat          |
| AJ414700 R          |                                                        | ggcctgagtctgtgtgtttgt    |
| AJ414701 F          | TaGSTU3                                                | ccgcctatgtgaacgacaa      |
| AJ414701 R          |                                                        | gggtctcctcatcttaccg      |
| AJ440796 F          | TaGSTF1                                                | gtgccttatccaatgc         |
| AJ440796R           |                                                        | aggaagtctccagccaggta     |
| AJ440792 F          | TaGSTF3                                                | caagaaggtgctggaggtgt     |
| AJ440792 R          |                                                        | aaggggaagtggctgaggt      |
| AJ441055 F          | TaGSTF6                                                | caagaagccgtgatttgcta     |
| AJ441055 R          |                                                        | gcgacaccaacaagaaaaga     |

>gnl|SRA|SRR7345723.25110 25110

AATTTAAGGAATCATTTTCATTATTTCAAATAAGAAATTACAGTCAGGTCTTCCTAATGTT  
GTTTCAGATGAATCCGGACCTCATTCTCCAAAGCCGAGACAGGCTTAAAGGCACACAAAA  
CCACCAAGACAATATTTAACATTTGAGTTCACCTCGAATCCTCGATTACGTTTCTTGATT  
CTCTCCCCGCCTGTTTTCATACAGAAGTTCGTCACTTCATACCTCAGCCAATATTTAGAG  
CATTACTCCGTCTTTTCACACTCCAACAACATATTTCAACCCTATTATAACCACAAAGACC  
CCTAACTTTTTACCCACACACTTTTCAGGGTTCATAAATATCAAAAATCAAAGAAAAAGAGA  
GAAAAACTAGATCTAAGTATTTTCTTGTTCTATCAGAAAAAATCACTAAGTTTAGTCAT  
GGCAGGATCAGGAAGTGAAGATGTGAAGATTTTAGGTGGATGGCCAAGTCCATTTGTGAT  
GAGGCCTAGAATTGCACTCAACATTAAATCAGTCAAGTATGATTTTCTCGAAGAGACATT  
TGGCAGCAAAAGTGAACCTTCTTCTGAAATCAAATCCTGTCTACAAGAAGATTCCTGTTAT  
GATTCATGGCGATAAACCCATCTCTGAATCAATGATCATTGTTTCAGTACATTGATGATGT  
TTGGTCTTCTGCTGGTCATTCTATCATCCCTTCTGATCCTTATGATGCTTCCATTGCTCG  
TTTCTGGGCAACCTACATTGATGACAAGTTCTTTCGGTCTTTATTTGCGATTGCCAAAAG  
TAAGGATGAAGAAGAAAGAAAAGCAGCCATTGAACAAGTGATTGCAGCTTTTGGTATACT  
GGAAGAAGCGTATCAGAAAAGTAGTAAAGGAAAAGACTTCTTGGTGGAGAGAAAATTGG  
GTATATTGATATCTCATTTGGGTGTTATGTTGGTGGATTAAAGCTTCAGAGAAAATGAA  
TGGAATCAAAGTGTGATGAAACAAAAGTTCCCGGACTTACAAAATGGGCTGACAAGTT  
TTGTGCAGATGAGTCAGTTAAATCTGTTATGCCTGAAGCGGATGCTCTCATAGAGTTTCG  
CAAGAAGATCTTTGGATCTAAACCTCCTCCTTCAAAGTAAAAAGCTGTAAACGATCTTA  
GAGATCTTTTCAGATTGTGGTTTTTTTTCCCTTTCAAATGTTGTTTGTAGTAGTGTAAAGA  
ACTAGTGATGGTCTAATTTTGTTTTTTCATAATAAAATGTATGCACT

>gnl|SRA|SRR7345723.22480 22480

ACCACACACTTTTCAGGGTTCATAAATATCAAGAATCAACCAAGAAAACTAAAGGAAAAC  
TAGATCAAAACTTTCTTCTTCCATCAGAAAAAATCACTAAGTTTAGTCATGGCAGGATC  
AGGAAGTGAAGAGGTGAAGATTTTAGGTGGATGGCCGAGTCCATTTGTGATGAGGCCTAG  
AATTGCACTCAACATTAAATCAGTCAAGTATGATTTTCTTGAAGAGACATTTGGTAGCAA  
AAGTGAACCTTCTTCTGAAATCAAATCCTGTCTACAAGAAGATGCCTGTAATGATTCATGG  
TGATAAACCCATCAATGAATCAATGATCATTGTTTCAGTACATTGATGATGTTTGGGCTTC  
TTCTGGTCAATTCTATCATCCCTTCTGATCCTTATGATGCTTCCATTGCTCGTTTCTGGGC  
AACCTACATTGATGACAAGTTCTTTCCATCTTTAACTGGTGTGCAAAAAGCAAGGATGC  
AGAAGAAAGAAAAGCAGCCATTGAACAAGTGATTGCAGGGTTTGCTCTAATTGAAGAAGC  
ATATCAGAAAATTAGTAAAGGAAAAGACTTTTTTGGTGGAGAAAAAATTGGATACATTGA  
TATTGCATTTGGTTGTTACATAGGTTGGATTAGAGTTACAGAGAAGATGAACGGAATCAA  
ATTGTTTCGATGAAGAAAAAGTTCCAGGGCTTACAAAATGGGCTGAGAAGTTCTGTGCCGA  
TGAGACAGTTAAATCTGTCATGCCTGAAACTGATGCTCTCATGGAGTTTGCTAAGAAGAT  
CTTTGGACCAAAGCCTCCTCCTTCAAAGTGAAGGTTGTTAACAATGAAATATCTTAGA  
GATGTTTTTTTTTTTTTTTTTTCCTGTGTTGTGTGTAATGCGTAAGAAGTGTGTTAGTAA  
TGATTCAAGACAGTAACTGTAGTAATGGTGTAAATTGAGTTTTGATAATAAATTTTAGTAG  
TATGTACTACTGTTTAATGAAGTAGAGAACACTGTGTTATGG

>gnl|SRA|SRR7345723.6320 6320

ACCACACAACCTTTTCAGGGTTCATAAATATCAATTCCAGAACTTAGGTCAAACTAGATCA  
AAACTTTCTTGTTCCATCGGAAGAAAAATAAACACCAAGTTTAGTCATGGCAGGATCAGG  
AAGTGAAGAGGTGAAGATCTTAGGTGGATGGCCAAGTCCATTTGTGATGAGGCCTAGAAT  
TGCACTCAACATTAAATCAGTCAAGTATGATTTTCTTGAAGAGACATTTGGTAGCAAAAG  
TGATCTTCTTCTGAAATCAAATCCTGTCTACAAGAAGATGCCTGTAATGATCCATGGTGA  
TAAACCCATCAATGAATCAATGATCATTGTTTCAGTACATTGATGATGTCTGGTCTTCTTC  
TGGTCATTCTATCATCCCTTCTGATCCTTATGATGCTTCCATTGCTCGTTTCTGGGCAAC  
CTACATTGATGACAAGTTCTTTCCATCTTTAACTGGTGTGCAAAAAGCAAGGATGCAGA

AGAAAGAAAAGCAGCCATTGAACAAGTGATTGCAGGGTTTGCTCTAATTGAAGAAGCTTA  
TCAGAAAATTAGCAAAGGAAAAGATTTTTTCGGGGGAGAAAAAATTGGATACATTGATAT  
TGCATTTGGGTGTTACATAGGTTGGATTAGAGTCACAGAGAAAATGAATGGAATCAAATT  
GTTTCGATGAAACAAAAGCTCCCGGACTTACAAAATGGGCTGAGAAGTTCTGTGCCGATGA  
GACAGTTAAATCTGTTATGCCTGAAACTGATGCTCTCATGGAGTTTGCTAAGAAGATCTT  
TGGATCGAAGCCTCCTCCTTCAAACCTAGAAAAGTTGTTAACAATGAAATATCTTAGAGAT  
GTTTAAGCTTTGTGGGTTTTTTTTTTTTTCCAGTGTTGTGTGTAACGCGTAAGAAGCTGTTT  
TAGTAATGATTAAGAACAGTAAGTGTAGTAATGGTGTAATTGAGTTTTTGGTAATAAATT  
TAGTAGTATGTACTACTGTTT

**>gnl|SRA|SRR7345723.100827.1 100827**

ACCTTATTTCTTCTTCTTCCCTCTATGTTATGCTTCTTCGTTGGCGGAACTGCTTCGAAAT  
TGACATCAAGGTTATTGATCAACAAGGATTTGAAGGTACACTCTTGAGTACACGGAAGTTTT  
GAGCAAGGCGCATAGTGCAACATTTACTGTATCTCCCAAGTTCTTGGCACTTCTAATGAAAG  
AAGAACTCACTGGGGAATTAGCATGTGGTGTCTATTTGATAAATTTACGCAAGTGATAA  
GAAGTTGTTAAAACAATGACAGATCCGTCTTTTCTCAATAGCCCGAGAAGAACACTGAGTTT  
ATCAAAGAAGAGAGCGTCTGTGTCTTTTACAGACCCCGATGACAAGGTTTCTGGATTTCTCTG  
TATCTGAAGAACATGGTGCAAAGCCCTCAGAGGTATATGGCTTTGTGGGGTCTATTGCGACC  
ATCATGGCTACAGTTATCTACCTGATATGGGCCTACACTCCTGAACCTTGGCTTCATTCTGT  
AGGGATCACTTACTATCCTAGCAGGTACTGGGCATTGGCATTGCCATCTTATGCTATGGTTA  
CCATAGCATTAGCAATCACATTTTACATTGGTCTGAACTTCATGGCAACAGCTCCTCCAACC  
TCCTTCAACACCATATATGACGAATTCAGTAGAGAACAACTGTGTTCTCAGGTTTCAAAGGA  
AGGAGATGAGCAACCTATCGAACCTATATCAGATATTGGGATCCATCAAGTCAACGATCTCA  
TGTTTAACCATAGGCAAATTGATGCGTAGGAACTCTTTGACTTCATTTGTATATAAACCCAA  
AGACACAAGACTTGCCAATCCTACCCTGTTCTTGAATTTCCAGTCCTTCTAACACAACCTCT  
GAATATGTTGGTGCATACTGCAGGCAGCCTCCGATTTGACTATTTTACCATCTCATATTCT  
CATTTGGATAAGGAATTGCAATTAGGAAAGCACTAACAATGTTGGTGCATCAATAGATCACT  
CTTCATCCAACCTATTTTGCAGCTCTAGCCAGTGAGTCCTGAAGCAAGTAATTGAATTTGTTA  
GGCACCTCATGACCTGGAATCAGACTAGGAGGTATAGCAACTTAACTCCAACTGTTTGCA  
CTCTAAATTGCGCGACTGTTCTACAGGTTCTTCCTATGTGTACAAAATTCAATTCCATTCC  
CTCTCCGATAACCTGTGACTTCTCGCTGATTGCCTCTTGGATAGGAGATAAGAGTAATAAGA  
TAAGAGTAATATTATCCTGCTGTGATTGGGGCTTTTTGGCAATGACTAATGCTGTCATGCTA  
GTTTCAGTAGTTCTTACACCTAGGTTTTTGTTCAGAGAAAGCAACGTCCAATGCATCATGTGC  
CTTAACCTGTTACTTCTCCCTCGTGGATCCATGAATGTAAACCTTACATCCACTATGTGTTCA  
TTGTTTTCTTTTGTCTGTCATGAACTCAAGAACATCATGGACAGTGTCCCTAATGTTCAAC  
CTCTGTACCATGCAATTTAAAAAAATTTCTTCTTTAGAGTCAGACAGAAGCAATAAGAAAC  
TCTACTAATCCCTTTGAACTGAAGTTGCTTTTTTTATATAGGTTTCGATATCATTAGAAACAT  
CAATCCCGTAGAGTTCTCCCTGTAATTGGTCTTGCTAGAATCCTTGATTTGCTACTTGCAG  
TCCATAAAGAGAGTGAAAAATAACTTAGCAACCTACTGTATGTTTAGGAACCCAAATGGCCG  
TAGACGCGATGCAATAACCGCACCTAGAAGTAGATGCCTGAAGCTTCCATTTGATGCGTTTT  
GAACTTTTGATAGGTGAAGCCACGGAGGGAGAACTACCAAGTTCCTTGGAACTTGCAAGAGG  
TCATGCAGTACGTCACAGTACGGATAATTGGTATAAACTTCAAATGTCATTTAAAATTTTG  
CCAAAACCTTCTCGGATGATTAAATGTGATTTGCATAACAAAGTGATTATATGCTTCAATTA  
ATTTTCATAGCATATAGAATCAAATATAAATATCCGAAAGTGATCTCCATCTTAAAGAATAC  
AACATTGACTGAAGAAGACATATCGTGTTAATCATGCTAGCATTTCGTGGACCATCCATCGTC  
CCACTTCAATATTAATTCTAATTCCTTGTCTCTTCTTCTTTTCTTTTCTTTTCTTTTCTTTT  
TTTAATTAACAGTCGTGTACAGTCTATTATTATCTCGAAGCTTCTGTGCCCTCACAATCCATT  
CCCACGATGAAGCACCTTAAAGTGGAAAAGAATTAGGCTAGAACCCCGTTTGAAAATTTTAT  
GAGAAATCAACAATGCTGTACCTGTTTATACTCTGCAAATTTGTATTCGGCTAAATTATCAT  
TAAAAAAAAGTTTACATGAGCTGACACAAGATTTGGGTCTGAGCCTAGATTATCATTTAAAA

AAGTTTTACATGAGCTGACACAATATTTGGGTCCGAGTCAAATCCTTACTTCGACCCATTTA  
AGTCAGGTAAAAAAACACTCTTGCCGGTGCCACTGTAGTACAGTGGTAAAGTCACTGGGGTG  
ATGATACCAGTGACCTGAGTTAGAATCTCGCTAGCAACCATAATTCTTTACCGATCCAATAA  
AAAAAAGAAAAAAAACCTCTTGATTCAAGGAACCAAACTGGTTTCGCACATTTTTGAGTC  
ACATTAGTTAAATTCAACTCAAAACAAACCTATCGAATTAGATCCAGATGAATTAGGTGATT  
TCACTCGGATTTCGGACAACCTCATATAAACCAAAAATAAACTCGAATCCACACCAGTCAGA  
TGATGAGTCAGGACCGAACAAACATAGTGCAAGTTTTCTTTTGTTTTCATCCACGCATATAT  
ACAGAAATCATCCAGCACATGGGACTTCCCACCTGAACTCACACATGGTAGCTCACTTACCG  
GTTAGCTGCTGGAAGCGTGTGTAACCCCATATCCTTTTTTCACACAAAAATCTTGACACACC  
GGTCAATTTTCATGTCGCAACAACCTTATACCATATACCACATTCATTCATCGACATTTAAAGC  
CGCATCGTTTTTCCACACAGCGCTGCACTCTTCCTACCACGTGTCTGTGTTTGGTAGAAAGA  
GAGGACAAGGTGGTGTAGATAGTAGACTTTATGACACTGGATTAAATGATAGTGGATTACTG  
GATAAATTAAACATATGACAGACTCCGCATTTAGACACAATTAGTACCAAAAATAACGAAAAT  
GCCACTATACTGACAAGCTGCTCAAACCTCCACAGCCATCCTCTAGGGGTGTCAACTGTAAT  
AAACACACCACTTTGTTCAATTTCCCAAGACAGAGAACCTTTGAATTCATTTTCATCGCTCTA  
TTATAAATTGGCATCAAACCTTTCACTCTCTGCATAGAAATCAAATAAGATCATCATTTTC  
TTGAAAACCTCACTGGATAATTAATGGCTGTTCTCAAGGTTTCATGGAAGTGCAATTTCAACTG  
CAACTCAAAGAGTTATTGCTACTATTCTCGAAAAGGGTCTTGATTATGAACTAGTTCTTGTC  
AATTTACGTGAAGGTGAACACAAGAGAGAACCCTTCATCTCTCTCAACCCATTTGGTCAAGT  
TCCAGCCTTTGAAGATGGAGATTTGAAGCTTTTCGAATCAAGAGCCATCACACAGTACATCG  
CACATGACTATGCAAGCAGCGGAACCCCGTTGATTTTCGTTTCGAGAAGATGCCGGTAATGGTG  
AACTGGATGGAAGTCGAGGCACACCATTTTGAGCCGGTATCATCGGCTTTGGCTTGGGAGTT  
GGTGTTTAAGCCGATGTTTGGTATGACTACGGACGCAGCTGCTGTTGAGGAAAATGAAACCA  
AGCTGGGTAAAGTCTTGGATGTGTATGAAAAAGACTTAGCCAGTCCAAGTATTTGGCTGGA  
GATGAGTTTACTTTGGCTGATCTTCATCATCTTCCTAATCTTCAGTGTTTGATGGGTACACC  
AGTTAAGAAGTTTTTTGAGTCTAGACCTCGTGTTTCTGCCTGGTCTGAGGATATCTTAGCTA  
GACCTTCCTGGGCTAAAGTTCTTGATTTGCAGAAGAACCACTAAAAGGAATTGGGTGTGTCG  
CAAATCTAATATTTATTTCAAACTAGTGGTTGTTCTTGTTGTTTGAGTTCTAGATCAGGAAC  
AGAAAAATCCATACAGAATTTTCTGATTAATAAATGATTGTAAGTTTGTTGTTTAGCATAA  
TGTCGAATGCTTGTGTGATTGTTTGAAAACCTACGGATTGGAGCAATTG
